# Supplementary material for: Potential Pathways of Spread of Highly Pathogenic Avian Influenza A/H5N1 Clade 2.3.4.4b Across Dairy Farms in the United States
Source: medRxiv preprint, doi:10.1101/2024.05.02.24306785, version 1 (2024-05-04)
Supplement: Supplementary [file 306785_file08.docx]

**Table S1:** Dairy Farm Outbreaks by associated WAHIS outbreak reference number, start date, state and county [1].

| Outbreak Reference | Start Date | State | County |
| --- | --- | --- | --- |
| TX 011 | 2024-03-10 | Texas | Castro |
| TX 007 | 2024-03-11 | Texas | Hale |
| ID 001 | 2024-03-13 | Idaho | Cassia |
| TX 001 | 2024-03-13 | Texas | Castro |
| TX 004 | 2024-03-14 | Texas | Moore |
| TX 003 | 2024-03-14 | Texas | Hale |
| TX 010 | 2024-03-15 | Texas | Dallam |
| NM 002 | 2024-03-16 | New Mexico | Curry |
| TX 008 | 2024-03-17 | Texas | Dallam |
| KS 002 | 2024-03-20 | Kansas | Kearny |
| MI 001 | 2024-03-20 | Michigan | Montcalm |
| TX 002 | 2024-03-20 | Texas | Hartley |
| KS 001 | 2024-03-21 | Kansas | Seward |
| TX 005 | 2024-03-21 | Texas | Lamb |
| KS 004 | 2024-03-22 | Kansas | Stevens |
| KS 003 | 2024-03-25 | Kansas | Gray |
| TX 009 | 2024-03-25 | Texas | Dallam |
| OH 001 | 2024-03-27 | Ohio | Wood |
| NM 003 | 2024-03-28 | New Mexico | Curry |
| NM 004 | 2024-03-29 | New Mexico | Curry |
| SD 001 | 2024-03-29 | South Dakota | Brown |
| MI 002 | 2024-03-30 | Michigan | Montcalm |
| NM 006 | 2024-04-01 | New Mexico | Curry |
| NM 005 | 2024-04-01 | New Mexico | Curry |
| NM 007 | 2024-04-02 | New Mexico | Curry |
| TX 012 | 2024-04-03 | Texas | Hartley |
| NC 001 | 2024-04-04 | North Carolina | Wake |
| MI 004 | 2024-04-08 | Michigan | Ottawa |
| MI 005 | 2024-04-10 | Michigan | Isabella |
| MI 003 | 2024-04-11 | Michigan | Ionia |

**Table S2:** Affected wild bird species caused by highly pathogenic avian influenza H5N1 in the United States from 2021 to April 2024.

| Category | Species |
| --- | --- |
| Waterfowl | American Black Duck, American Green-winged Teal, American Wigeon, Blue-winged Teal, Bufflehead, Cackling Goose, Canada Goose, Canvasback, Cinnamon Teal, Common Eider, Common Goldeneye, Common Loon, Common Merganser, Fulvous Whistling Duck, Gadwall, Greater Scaup, Greater White-fronted Goose, Hooded Merganser, Lesser Scaup, Mallard, Mallard/Black Duck Hybrid, Mottled Duck, Muscovy Duck, Mute Swan, Northern Pintail, Northern Shoveler, Redhead Duck, Ring-necked Duck, Ross's Goose, Ruddy Duck, Sandhill Crane, Snow Goose, Trumpeter Swan, Tundra Swan, White-winged Scoter, Wood Duck. |
| Non-waterfowl | American Coot, American Crow, American Kestrel, American Robin, American White Pelican, American Wood Stork, Arctic Tern, Bald Eagle, Barn Owl, Barred Owl, Black Skimmer, Black Turnstone, Black Vulture, Black-bellied Plover, Black-billed Magpie, Black-crowned Night Heron, Black-legged Kittiwake, Boat-tailed Grackle, Bonaparte's Gull, Brandt's Cormorant, Brant, Broad-winged Hawk, Brown Pelican, California Condor, California Gull, California Quail, Caspian Tern, Cattle Egret, Common Grackle, Common Murre, Common Raven, Common Tern, Cooper's Hawk, Crested Caracara, Dark-eyed Junco, Double-crested Cormorant, Dunlin, Eared Grebe, Eastern Screech Owl, Ferruginous Hawk, Fish Crow, Forster's Tern, Gannet, Glaucous Gull, Glaucous-winged Gull, Glossy Ibis, Golden Eagle, Great Black-backed Gull, Great Blue Heron, Great Egret, Great Horned Owl, Greater Sage Grouse, Great-tailed Grackle, Green Heron, Harris Hawk, Herring Gull, Horned Grebe, House Sparrow, Laughing Gull, Long-eared Owl, Merlin, Neotropic Cormorant, Northern Fulmar, Northern Gannet, Northern Harrier, Osprey, Pacific Loon, Parasitic Jaeger, Peregrine Falcon, Pied-billed Grebe, Prairie Falcon, Red-necked Grebe, Red-necked Phalarope, Red-shouldered Hawk, Red-tailed Hawk, Red-winged Blackbird, Ring-billed Gull, Roseate Spoonbill, Rough-legged Hawk, Royal Tern, Ruddy Turnstone, Ruffed Grouse, Sabine's Gull, Sanderling, Sandwich Tern, Sharp-shinned Hawk, Short-billed Gull, Short-eared Owl, Short-tailed Shearwater, Snowy Egret, Snowy Owl, Snowy Plover, Swainson's Hawk, Thayer's Gull, Tree Swallow, Turkey Vulture, Western Grebe, Western Gull, Western Sandpiper, Western Screech Owl, White Ibis, Wild Turkey, Willet. |
